# Supplementary material for: Effect of distal histidines on hydrogen peroxide activation by manganese reconstituted myoglobin
Source: Royal Society of Chemistry journal article supplement (doi:10.1039/c3mt20275e), 2013-01-01

## Supporting Information

### Effect of distal histidines on hydrogen peroxide activation by manganese reconstituted myoglobin

Yuan-Bo Cai,<sup>a</sup> Xiao-Han Li,<sup>a</sup> Jing Jing,<sup>a</sup> and Jun-Long, Zhang\*<sup>a</sup>

### Table of Contents

|    |                                                                                                                             |    |
|----|-----------------------------------------------------------------------------------------------------------------------------|----|
| 1  | Spectral changes of F43H Mn <sup>III</sup> Mb in the reaction with 100 equiv. H <sub>2</sub> O <sub>2</sub> in pH 7.4 ..... | 2  |
| 2. | Kinetic data and spectral changes of Mn <sup>III</sup> Mb in the reaction with H <sub>2</sub> O <sub>2</sub> .....          | 3  |
| 3. | Spectral changes of ABTS oxidation for Mn <sup>III</sup> Mb at pH 7.4 .....                                                 | 9  |
| 4. | ESI(+)-MS of different mutants .....                                                                                        | 13 |

**Spectral changes of F43H Mn<sup>III</sup>Mb in the reaction with 100 equiv. H<sub>2</sub>O<sub>2</sub> in pH 7.4**

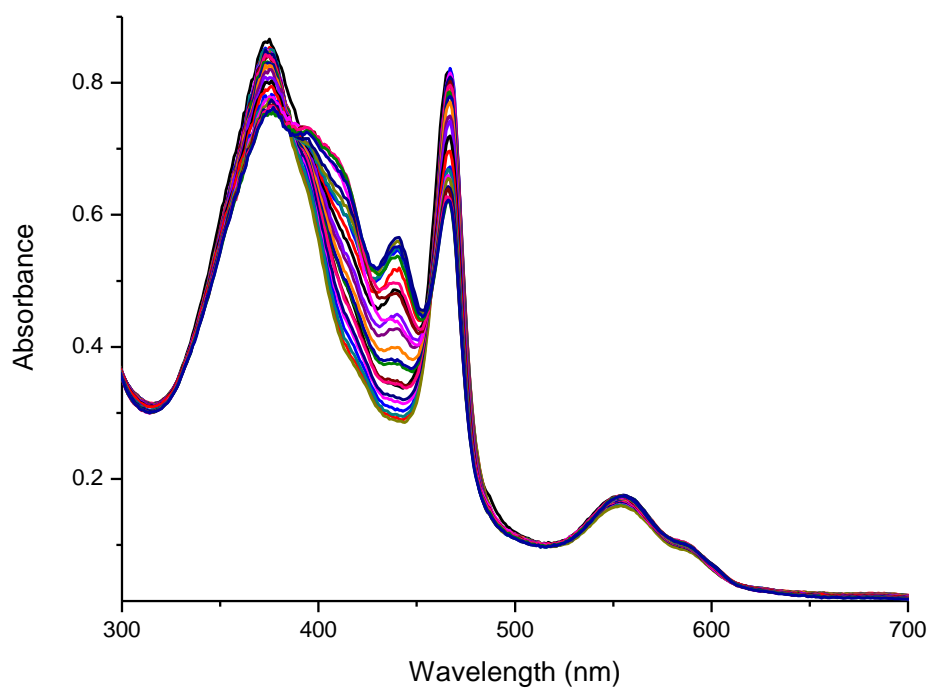

**Figure S1.** Spectral changes of F43H Mn<sup>III</sup>Mb in the reaction with 100 equiv. H<sub>2</sub>O<sub>2</sub> in pH 7.4

### Kinetic data and spectral changes of Mn<sup>III</sup>Mb in the reaction with hydrogen peroxide:

Conditions: the concentration was 29  $\mu\text{M}$  for Mn<sup>III</sup>Mb protein and 580  $\mu\text{M}$  for H<sub>2</sub>O<sub>2</sub>, the reaction temperature was 20 °C.

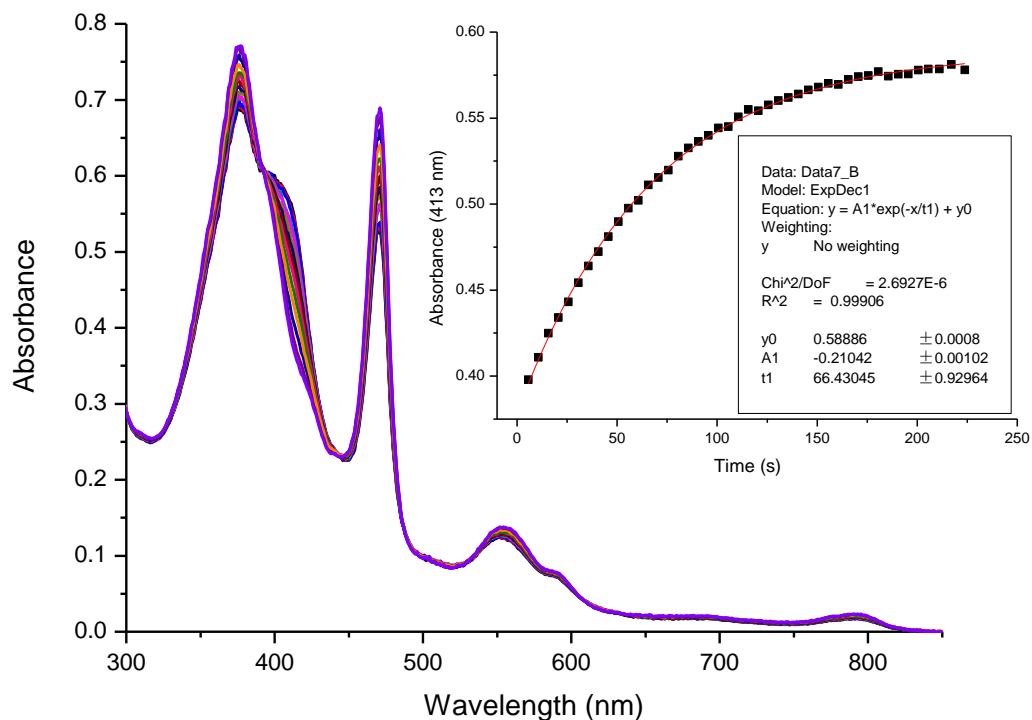

(a)

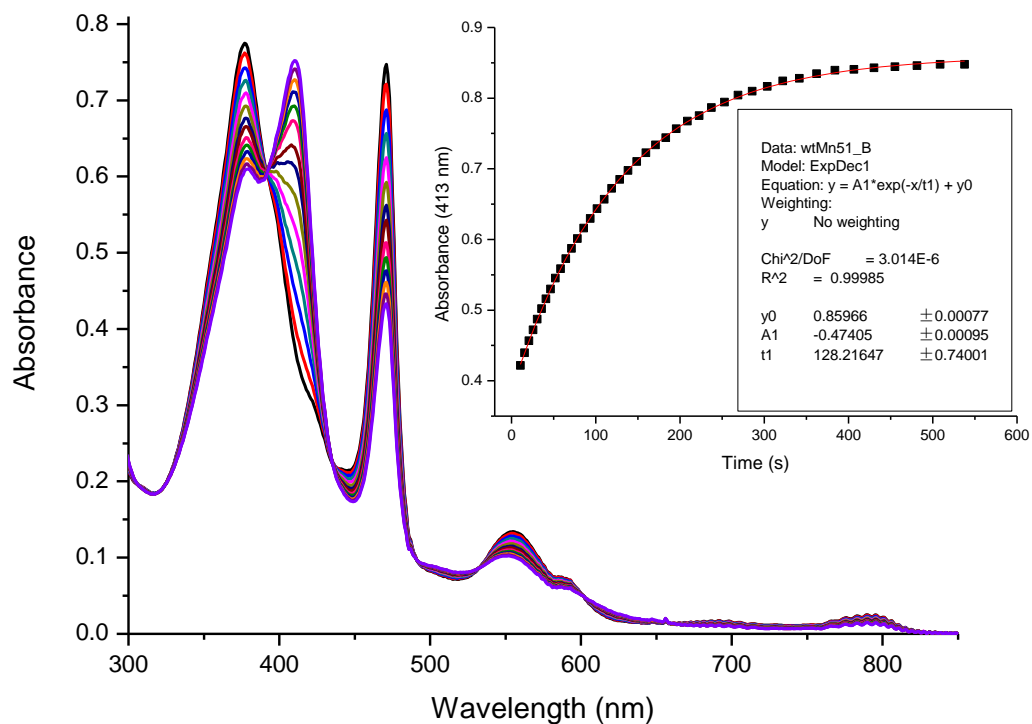

(b)

Figure S2 Spectral change of wild-type Mn<sup>III</sup>Mb in the reaction with H<sub>2</sub>O<sub>2</sub> at a) pH 7.4 and b) pH

5.1. Insets: trace for the formation of  $\text{Mn}^{\text{IV}}=\text{O}$  Por and the exponential fitting function,  $k_{\text{obs}}=1/t_1$

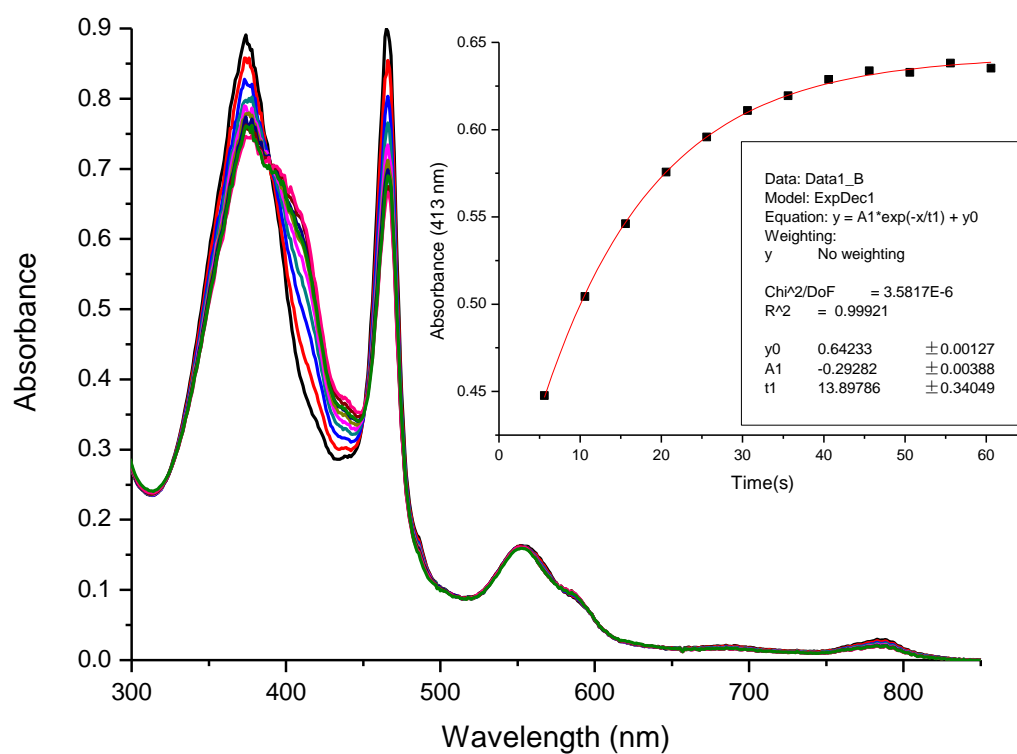

(a)

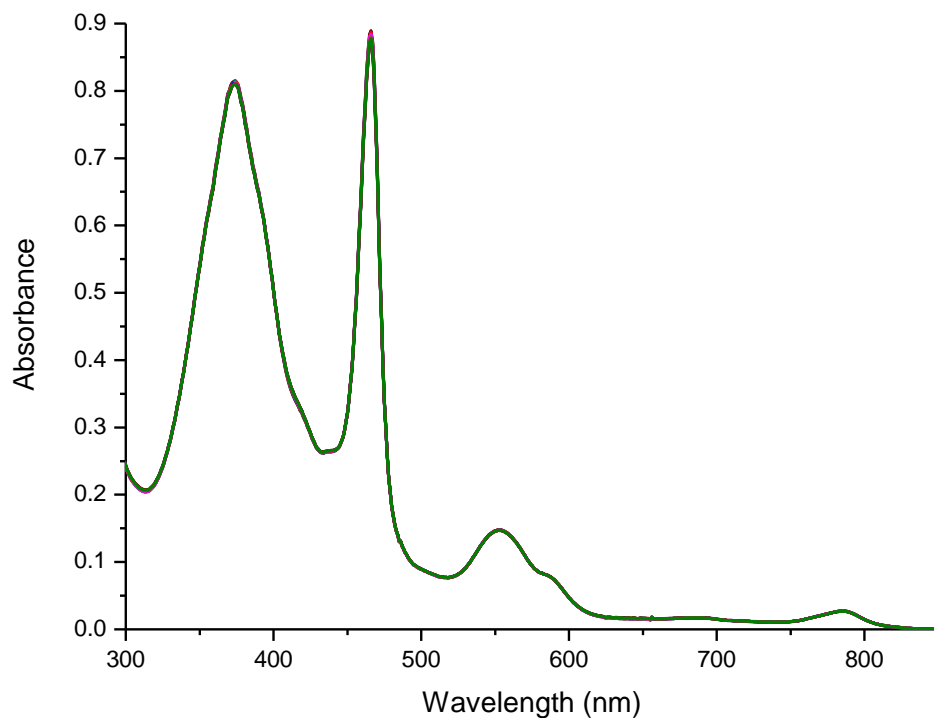

(b)

**Figure S3** Spectral change of F43H  $\text{Mn}^{\text{III}}$  Mb mutant in the reaction with  $\text{H}_2\text{O}_2$  at a) pH 7.4 and b) pH 5.1. Insets: trace for the formation of  $\text{Mn}^{\text{IV}}=\text{O}$  Por and the exponential fitting function,  $k_{\text{obs}}=1/t_1$

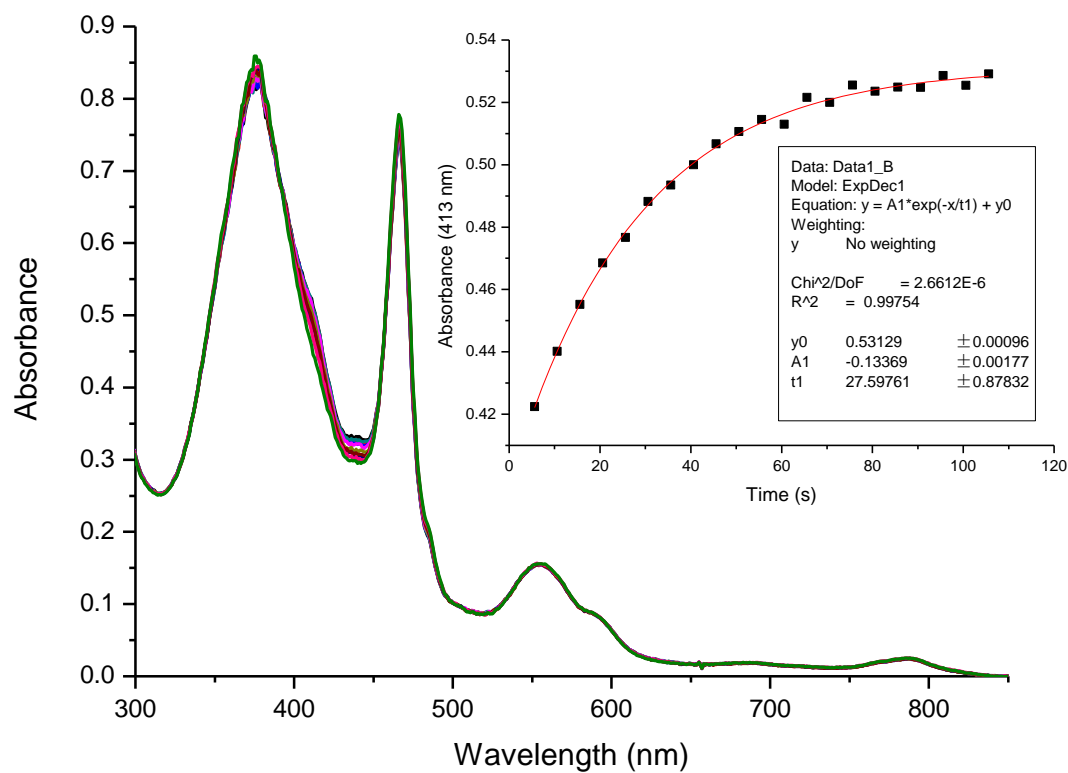

(a)

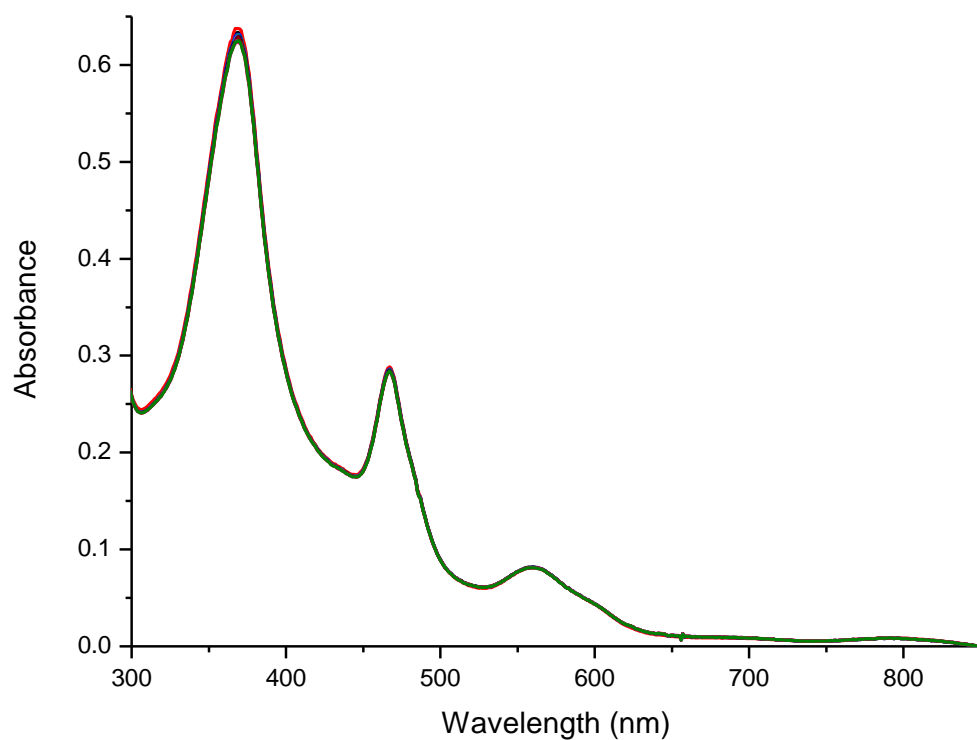

(b)

**Figure S4.** Spectral change of L29H/F43H Mn<sup>III</sup>Mb mutant in the reaction with H<sub>2</sub>O<sub>2</sub> at a) pH 7.4 and b) pH 5.1. Insets: trace for the formation of Mn<sup>IV</sup>=O Por and the exponential fitting function,  $k_{\text{obs}}=1/t_1$

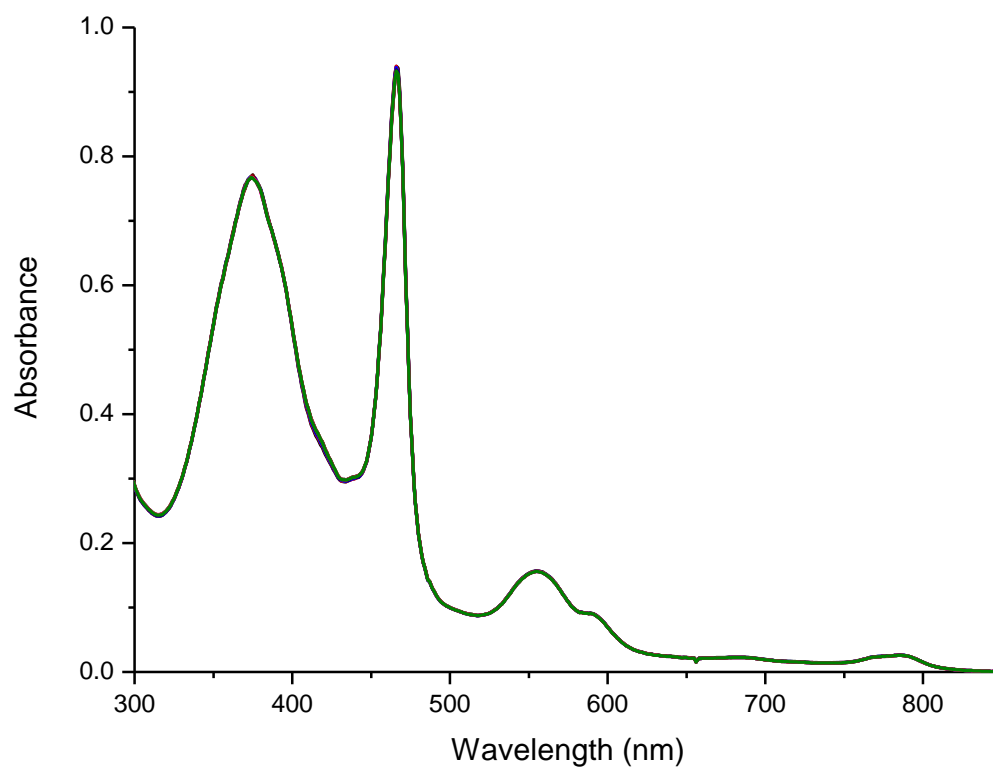

**Figure S5** Spectral change of L29H Mn<sup>III</sup>Mb mutant in the reaction with H<sub>2</sub>O<sub>2</sub> at pH 7.4.

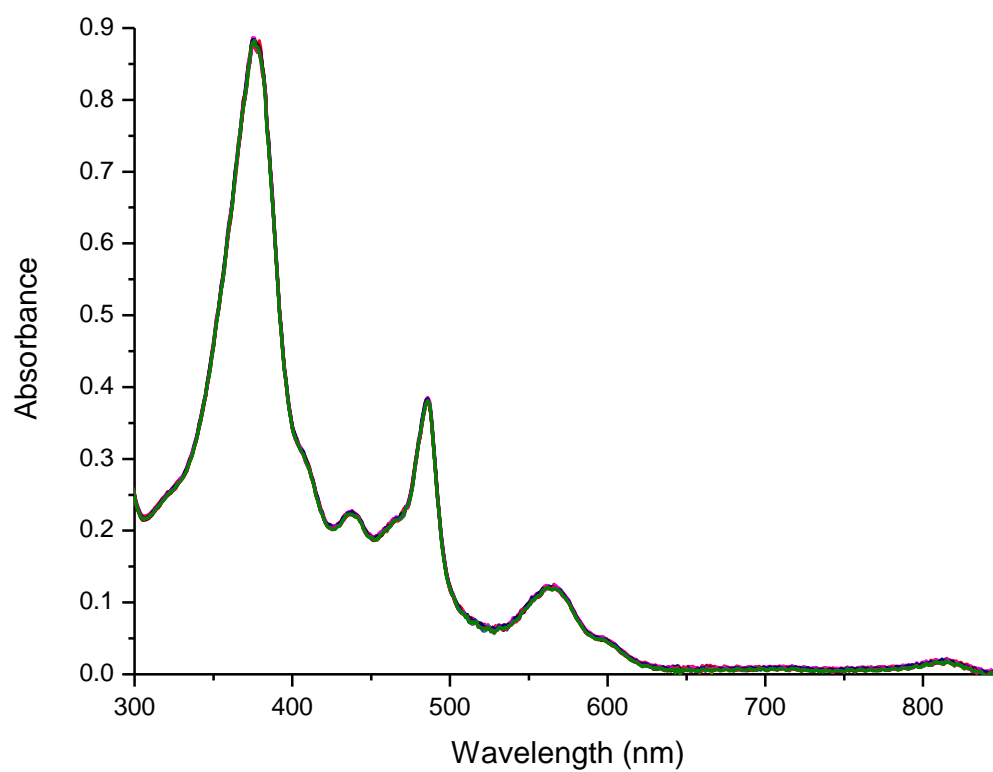

**Figure S6.** Spectral change of H64F Mn<sup>III</sup>Mb mutant in the reaction with H<sub>2</sub>O<sub>2</sub> at pH 7.4.

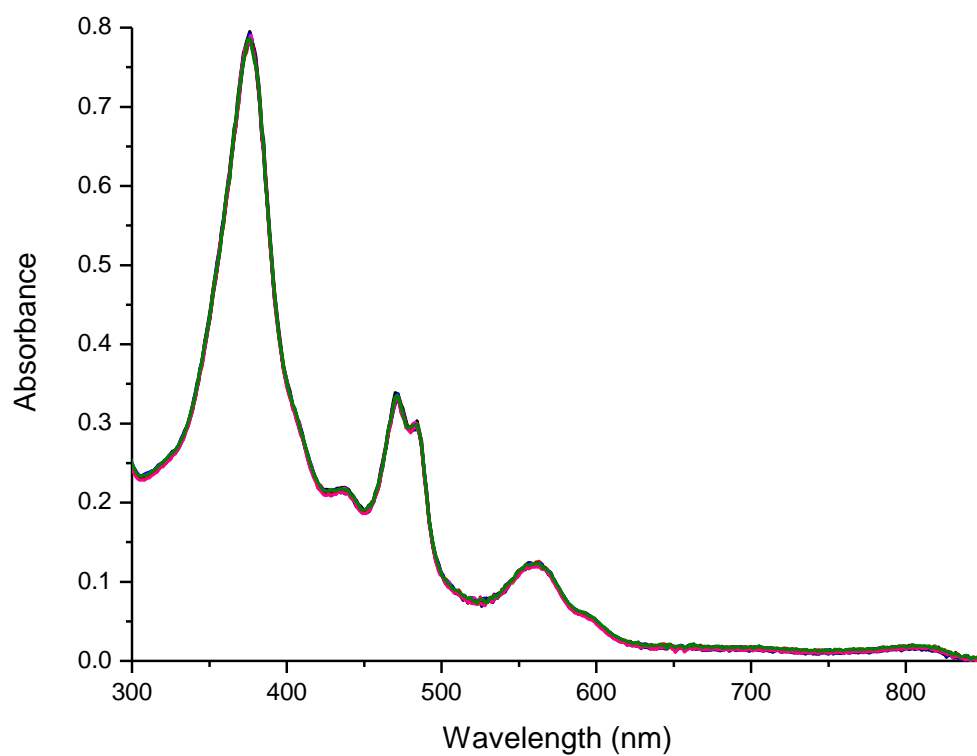

**Figure S7.** Spectral change of F43H/H64F Mn<sup>III</sup>Mb mutant in the reaction with H<sub>2</sub>O<sub>2</sub> at pH 7.4.

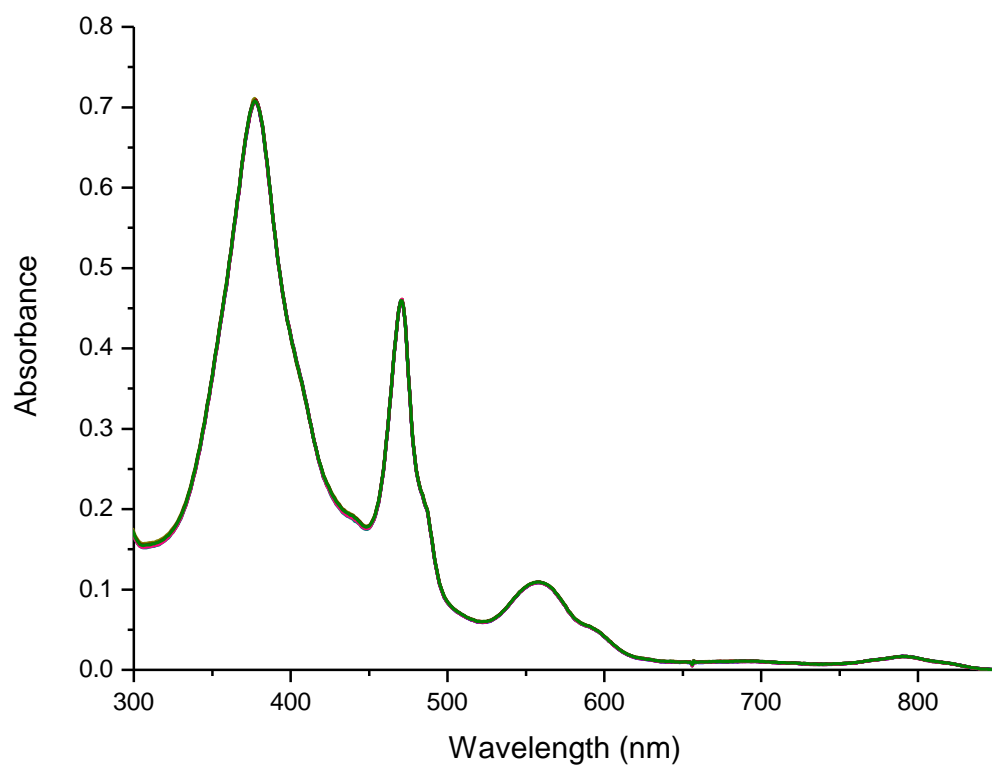

**Figure S8.** Spectral change of L29H/H64F Mn<sup>III</sup>Mb mutant in the reaction with H<sub>2</sub>O<sub>2</sub> at pH 7.4.

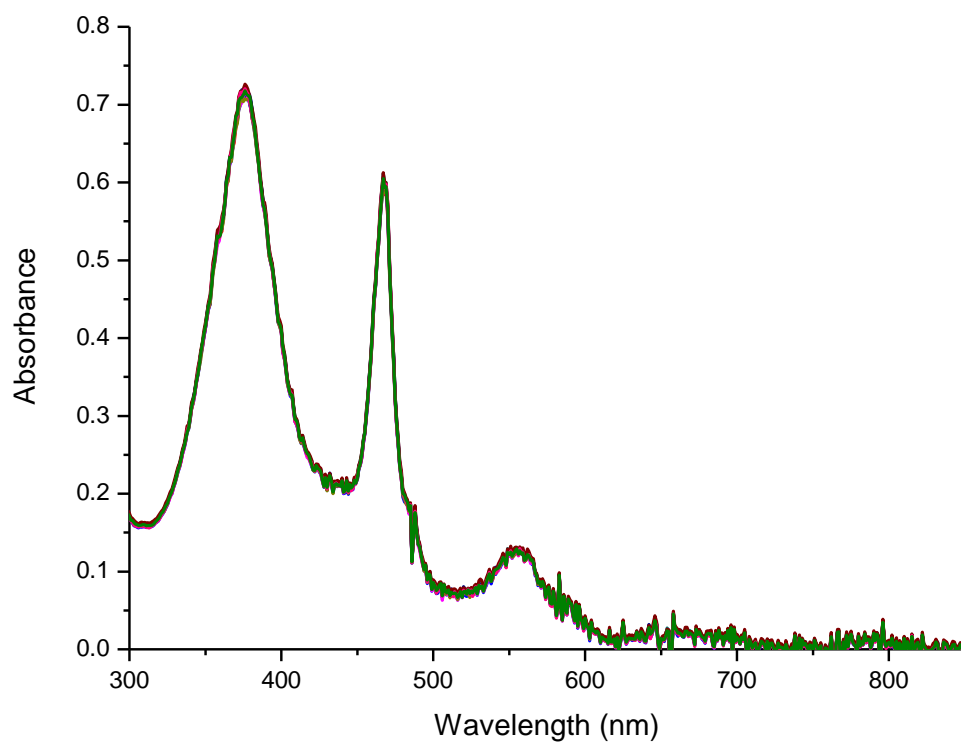

**Figure S9.** Spectral change of L29H/F43H/H64F Mn<sup>III</sup>Mb mutant in the reaction with H<sub>2</sub>O<sub>2</sub> at pH 7.4.



### Spectral changes of ABTS oxidation for Mn<sup>III</sup>Mb at pH 7.4:

Conditions: the concentration was 29  $\mu$ M for protein and 580  $\mu$ M for ABTS and H<sub>2</sub>O<sub>2</sub>, the reaction temperature was 20 °C.

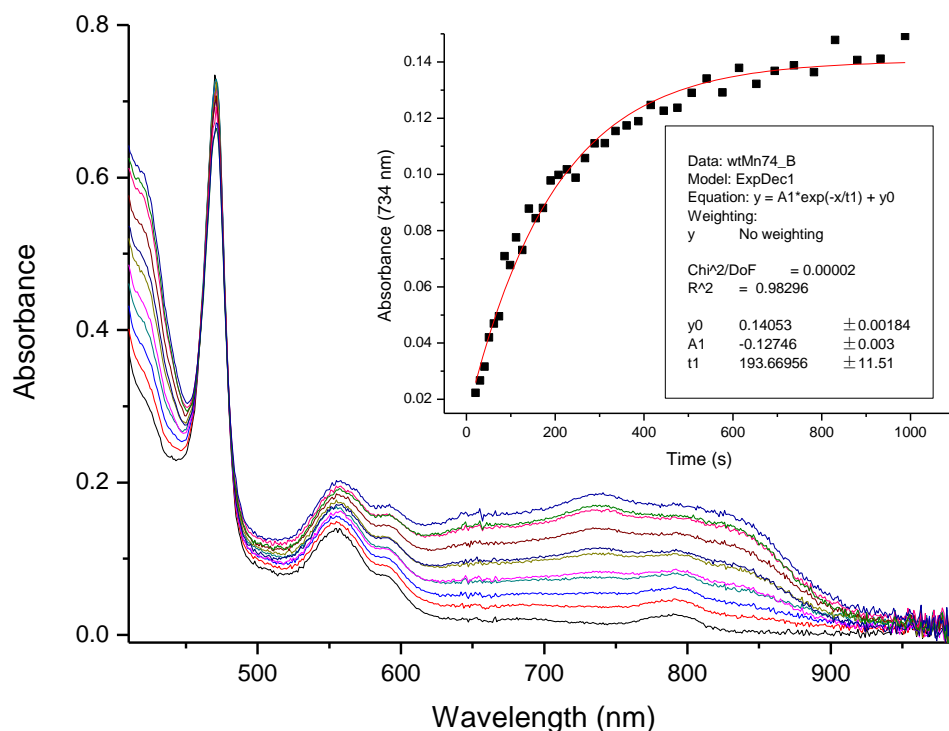

Figure S10. Spectral change of ABTS oxidation at pH 7.4 for wild-type Mn<sup>III</sup>Mb.

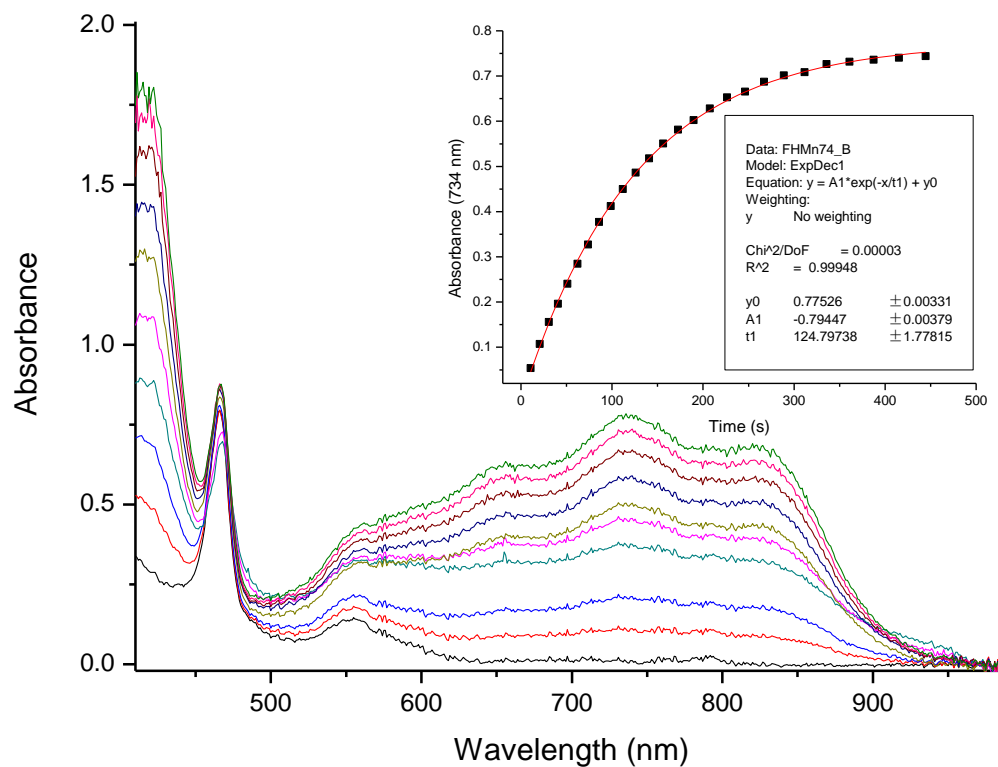

Figure S11. Spectral change of ABTS oxidation at pH 7.4 for F43H Mn<sup>III</sup>Mb mutant.

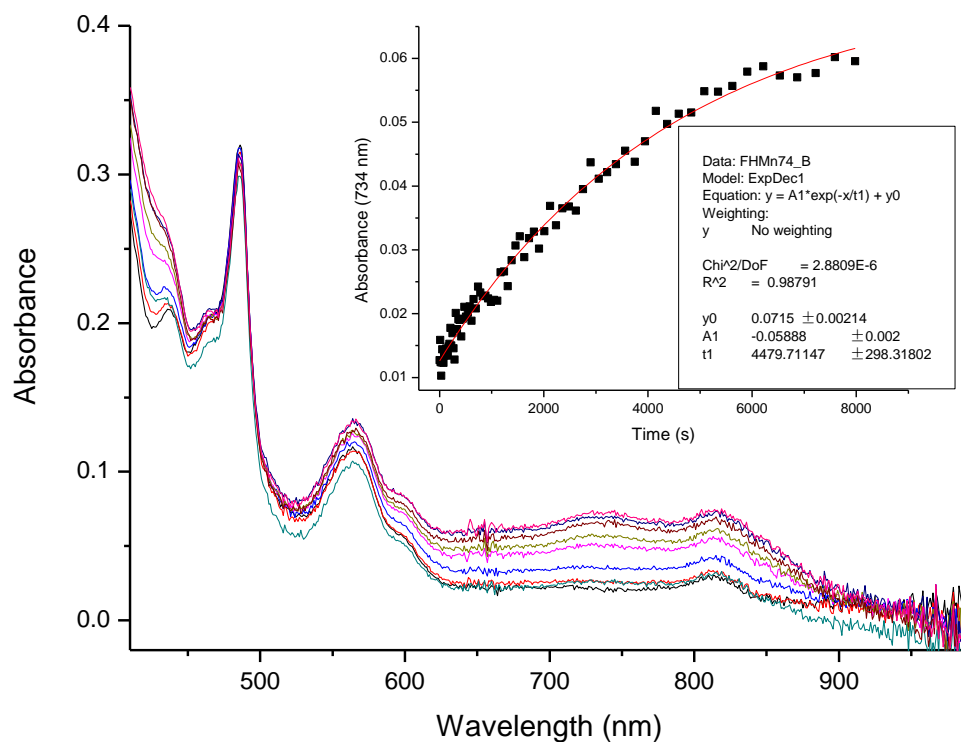

Figure S12. Spectral change of ABTS oxidation at pH 7.4 for H64F Mn<sup>III</sup>Mb mutant.

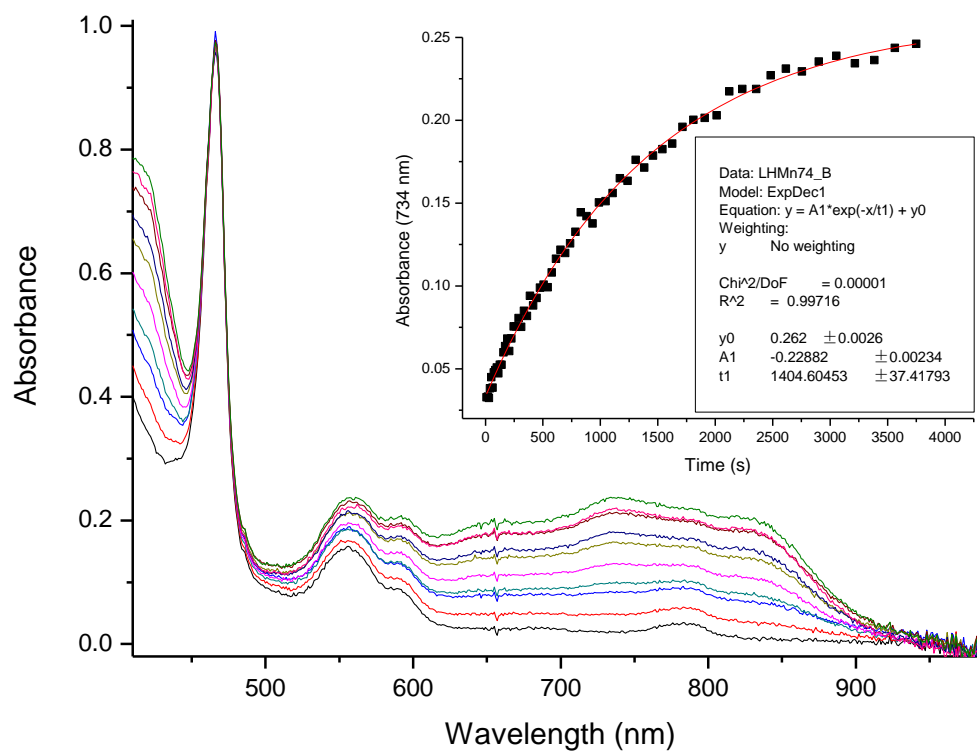

Figure S13. Spectral change of ABTS oxidation at pH 7.4 for L29H Mn<sup>III</sup>Mb mutant.

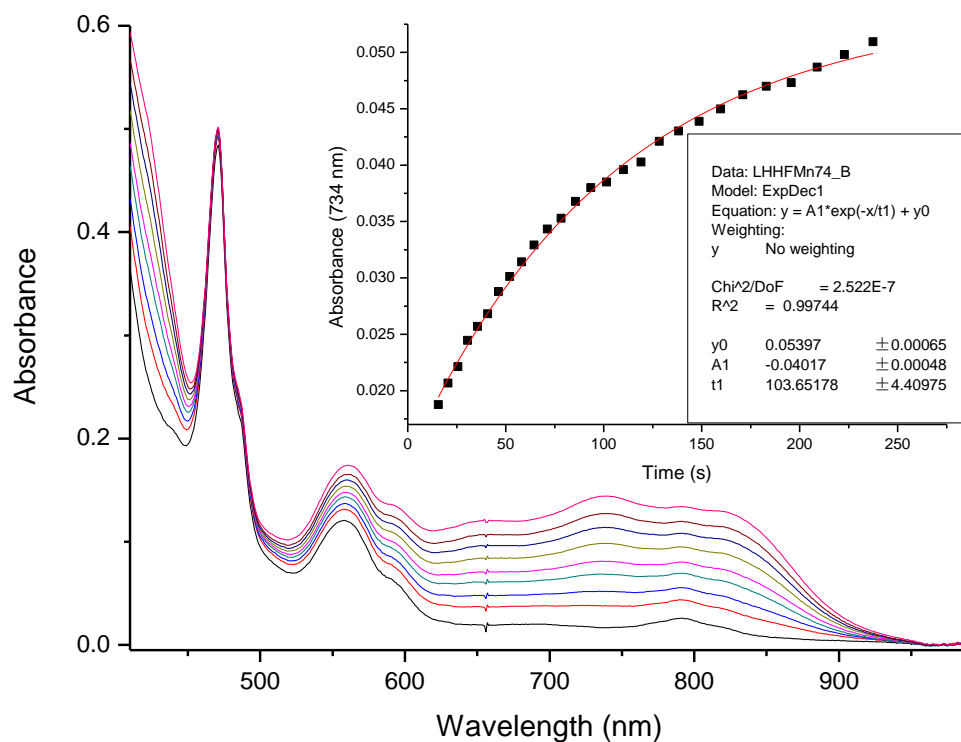

Figure S14. Spectral change of ABTS oxidation at pH 7.4 for L29H/H64F Mn<sup>III</sup>Mb mutant.

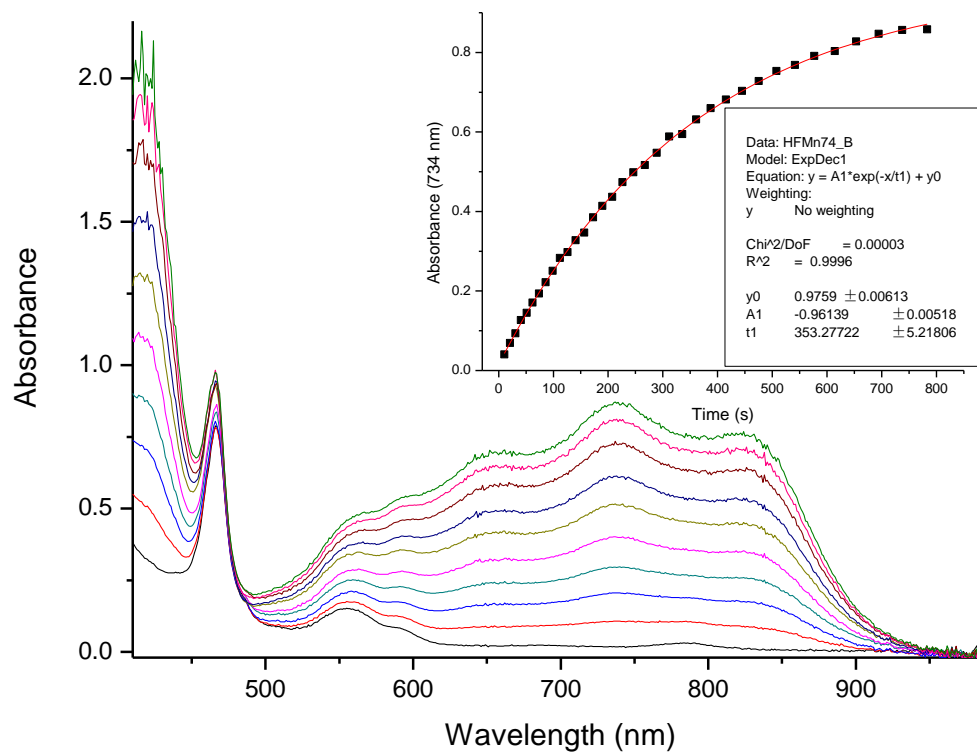

Figure S15. Spectral change of ABTS oxidation at pH 7.4 for L29H/F43H Mn<sup>III</sup>Mb mutant.

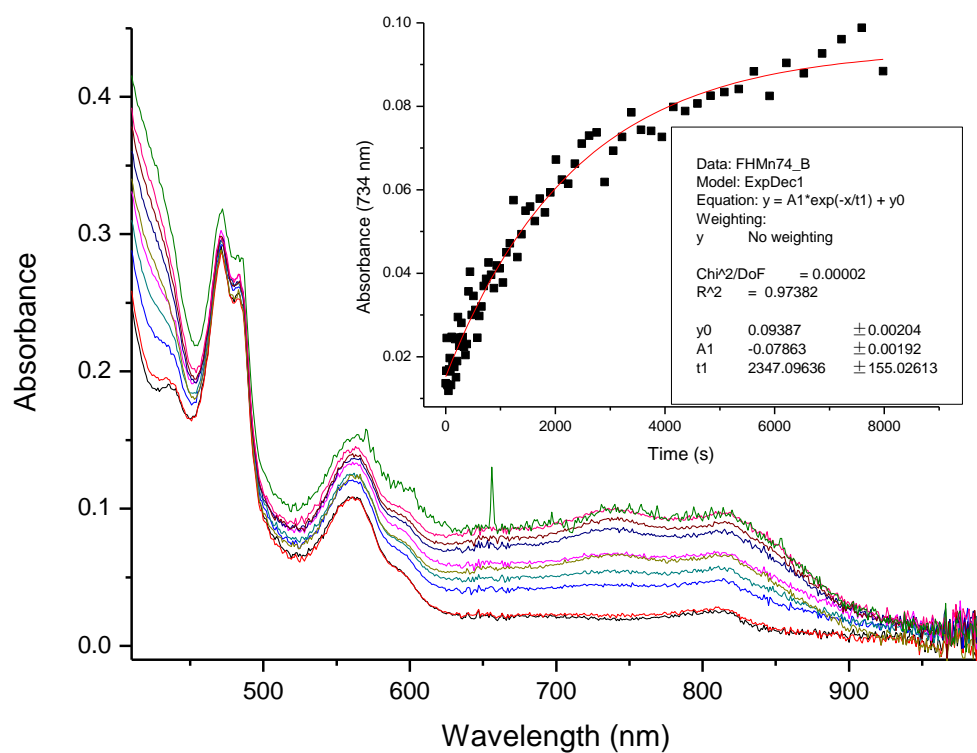

Figure S16. Spectral change of ABTS oxidation at pH 7.4 for F43H/H64F Mn<sup>III</sup>Mb mutant.

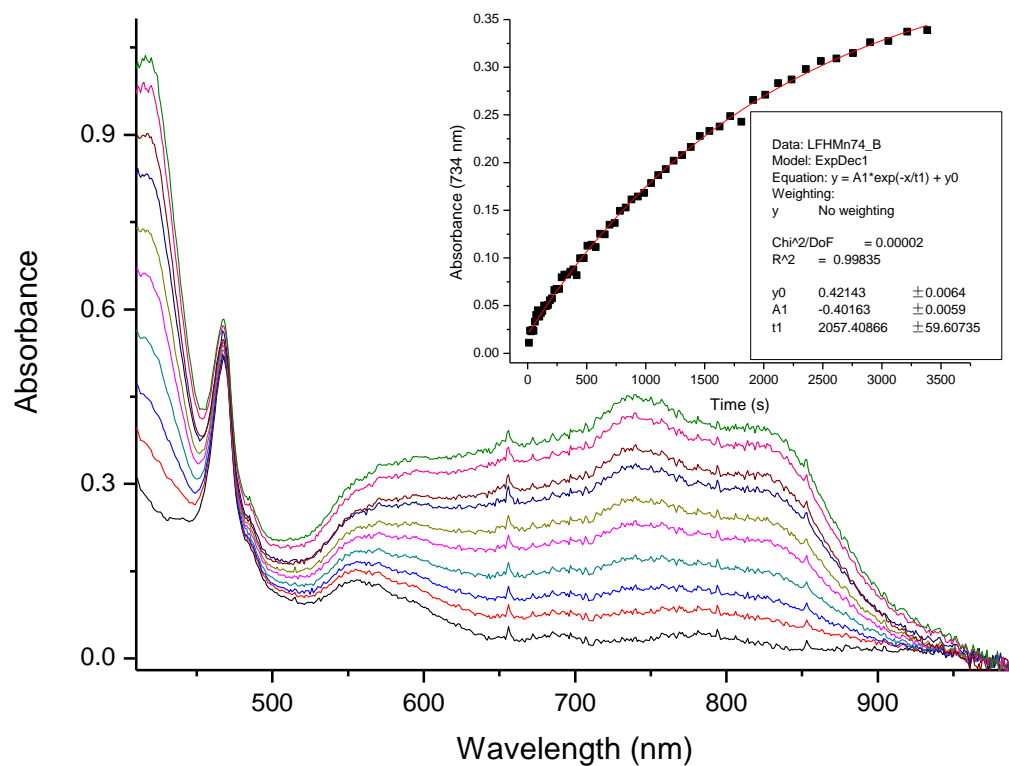

Figure S17. Spectral change of ABTS oxidation at pH 7.4 for L29H/F43H/H64F Mn<sup>III</sup>Mb mutant.

## ESI(+)-MS of different mutants:

Wild-type Mb:

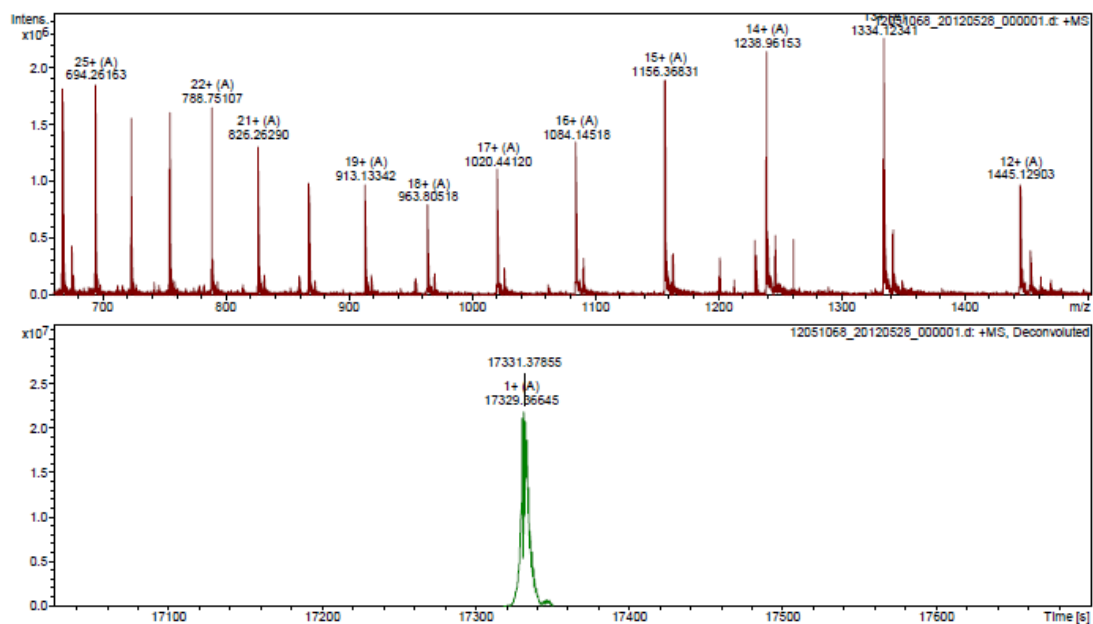

L29H Mb:

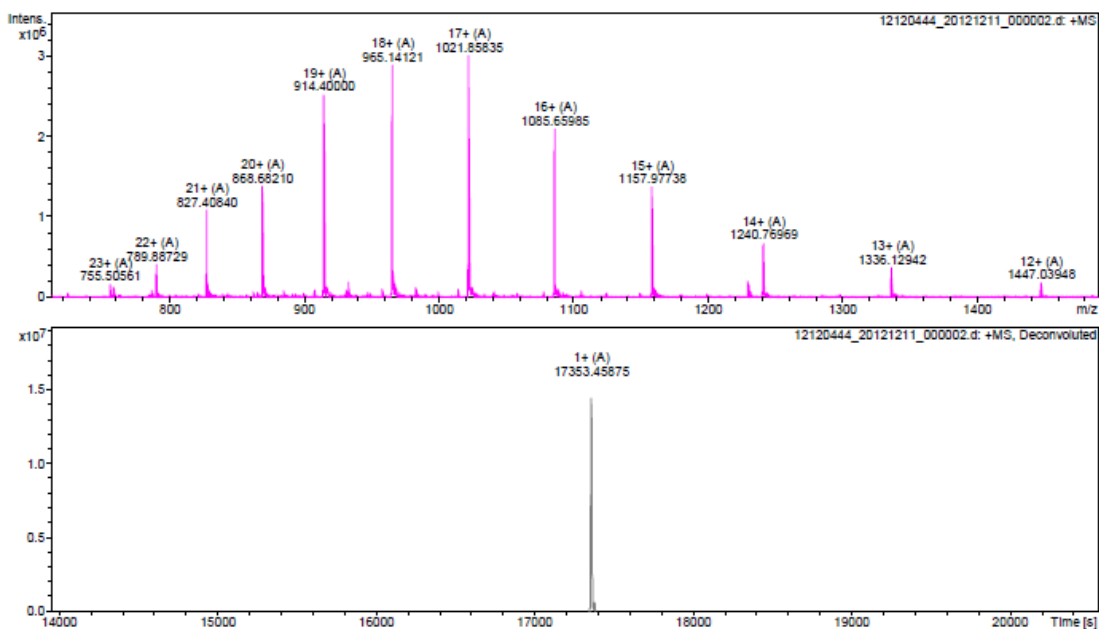

F43H Mb:

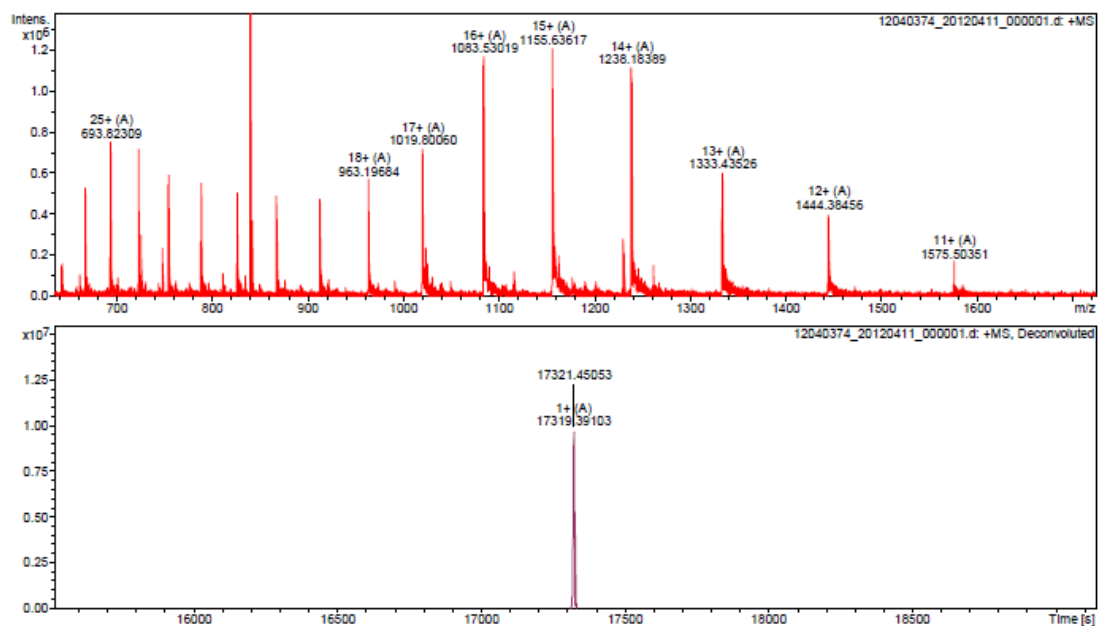

H64F Mb:

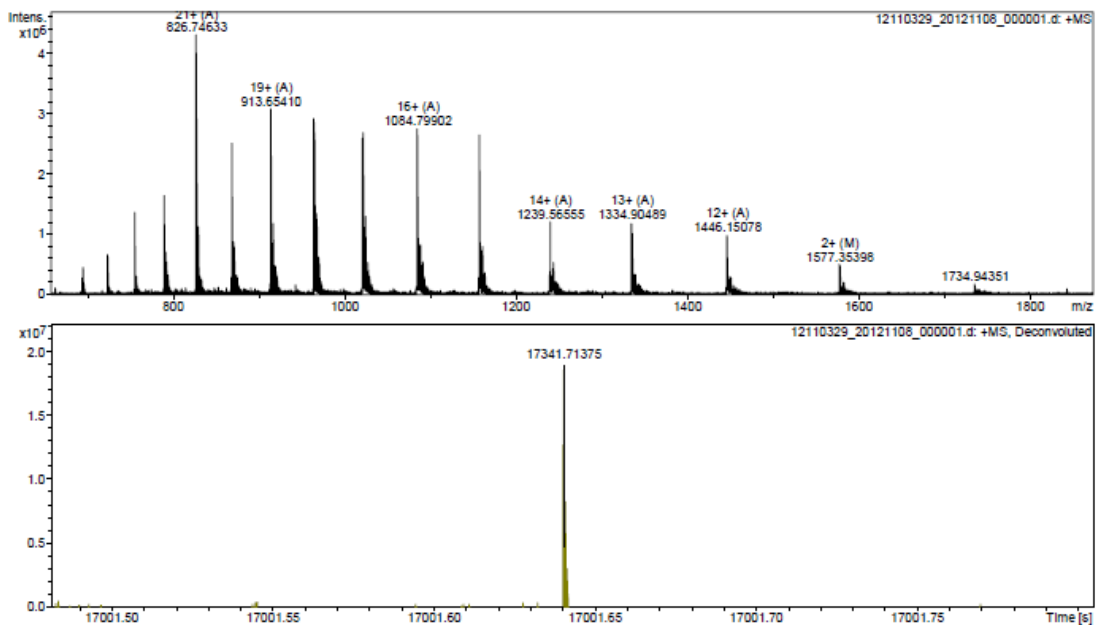

L29H/F43H Mb:

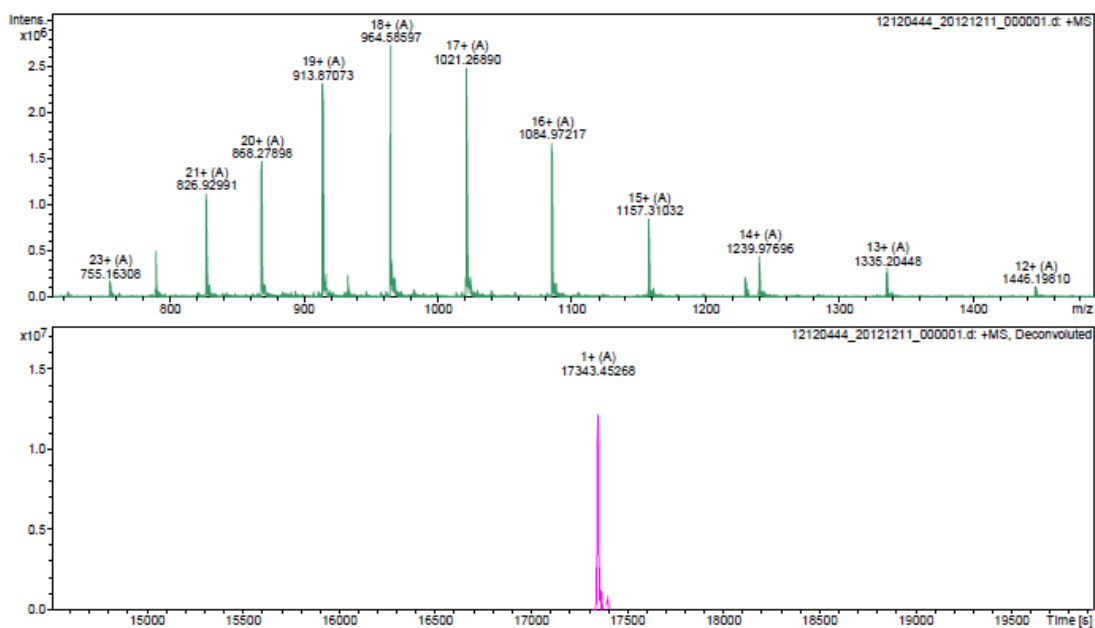

L29H/H64F Mb:

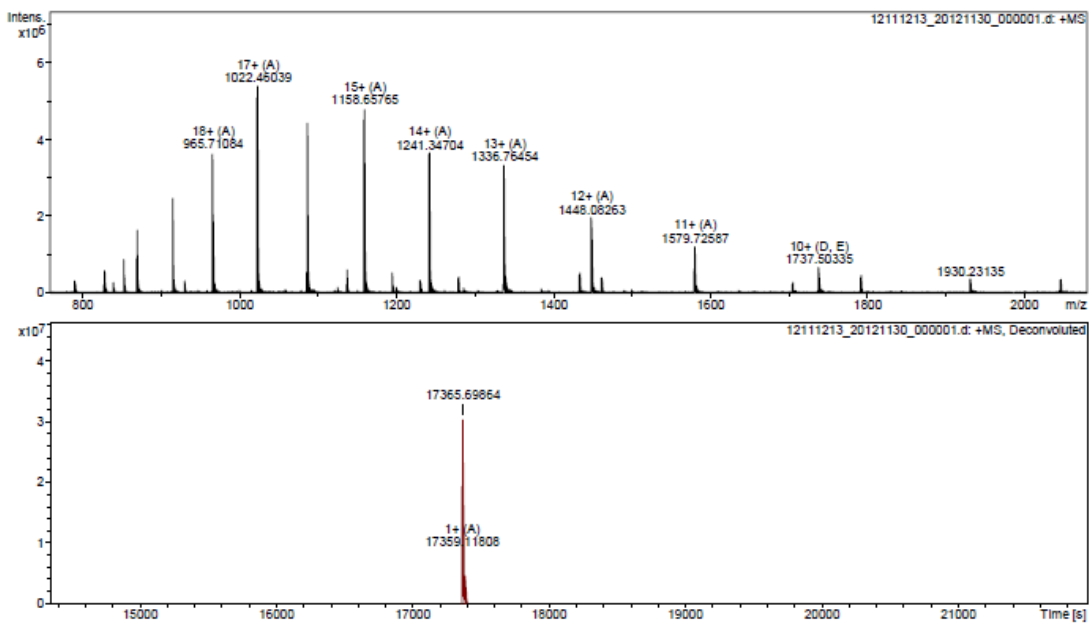

F43H/H64F Mb:

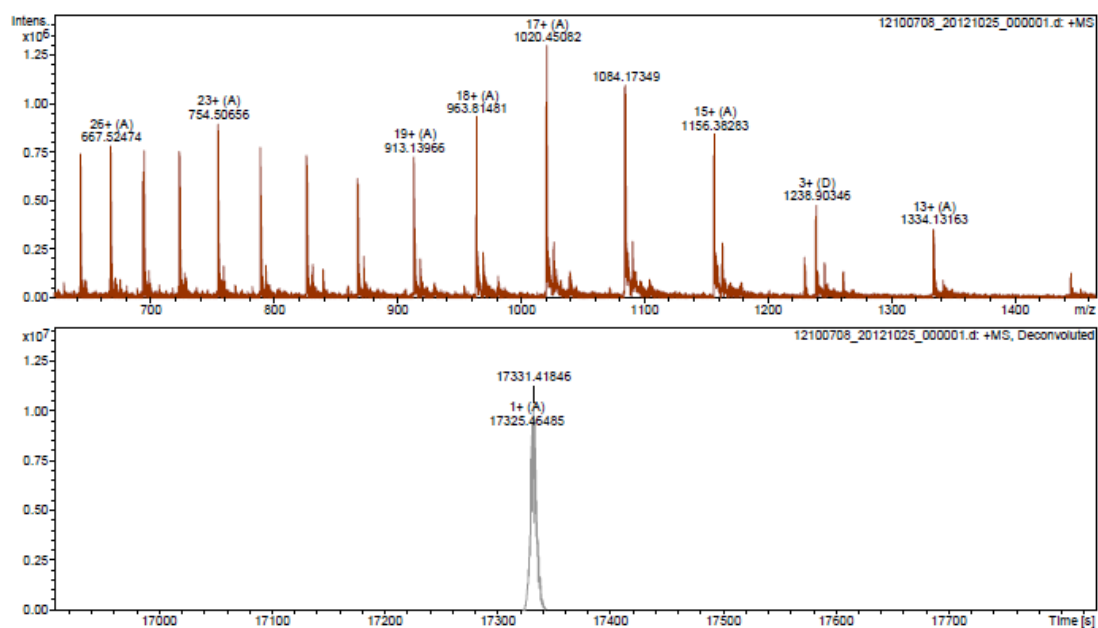

L29H/F43H/H64F Mb:

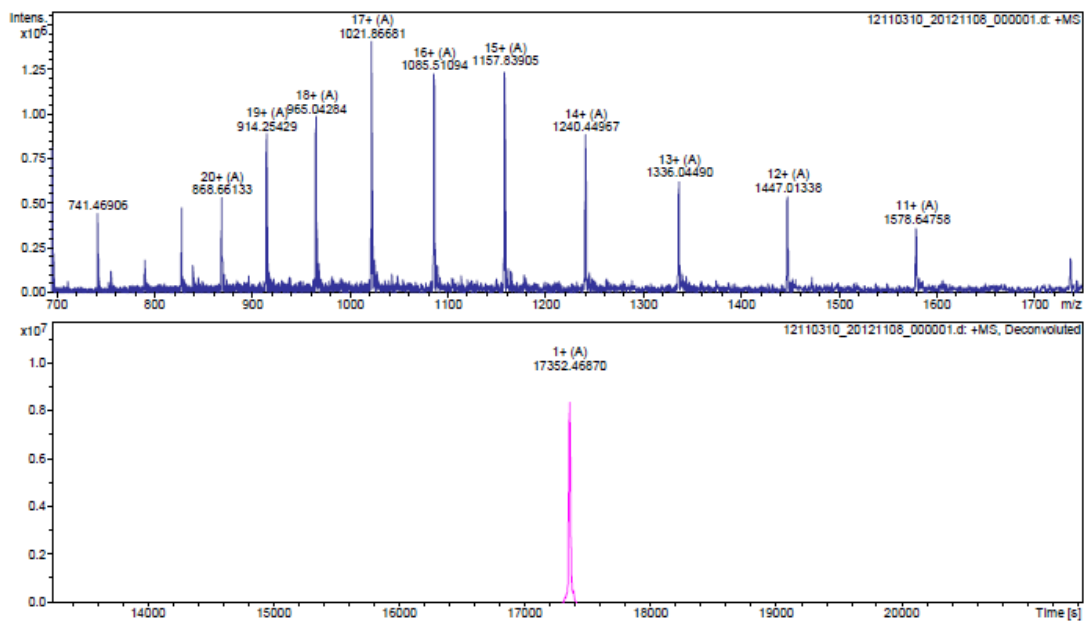

Supplement: c3mt20275e.pdf [file c3mt20275e.pdf]
